# Supplementary material
Source: PubMed Central journal article supplement (PMC4033641)
Supplement: ac500092q_si_001.pdf [file ac500092q_si_001.pdf]

## Supporting Information

### Capillary Zone Electrophoresis–Electrospray Ionization-Tandem Mass Spectrometry for Top-Down characterization of *Mycobacterium marinum* Secretome

Yimeng Zhao<sup>1</sup>, Liangliang Sun<sup>1</sup>, Matthew M. Champion<sup>1</sup>, Michael D. Knierman<sup>2</sup>, and Norman J. Dovichi<sup>1</sup>

<sup>1</sup>Department of Chemistry and Biochemistry, University of Notre Dame, Notre Dame, IN 46556, USA

<sup>2</sup>Eli Lilly and Company, Indianapolis, Indiana 46225, USA

#### Contents:

Table S1 – conductivity of aqueous formic and acetic acid solutions

Table S2 - Summary of CZE-ESI-MS cyt c analysis with different sampling buffers

Table S3 (separate file) - Observed proteoforms in the *M. marinum* secretome

Fig. S1 - HCD fragmentation of the 10-kDa culture filtrate antigen EsxB

Fig. S2 - Spectrum of both unacetylated ESAT-6 and acetylated ESAT

**Table S1** Measured conductivity of aqueous acetic and formic acid solutions

| <b>Formic Acid</b>         |                             |
|----------------------------|-----------------------------|
| <b>Concentration (V/V)</b> | <b>Conductivity (ms/cm)</b> |
| 0.1                        | 0.96                        |
| 1                          | 4.01                        |
| 5                          | 7.38                        |
| 10                         | 9.39                        |
| 20                         | 12                          |
| 30                         | 11.9                        |
| 50                         | 9.17                        |
| 70                         | 5.6                         |
| 100                        | 0.51                        |

| <b>Acetic Acid</b>         |                             |
|----------------------------|-----------------------------|
| <b>Concentration (V/V)</b> | <b>Conductivity (ms/cm)</b> |
| 0.1                        | 0.67                        |
| 1                          | 1.18                        |
| 5                          | 1.62                        |
| 10                         | 1.91                        |
| 20                         | 1.94                        |
| 30                         | 1.66                        |
| 50                         | 1.05                        |
| 70                         | 0.35                        |
| 100                        | 0.064                       |

**Table S2** Summary of CZE-ESI-MS cyt c analysis with different sampling buffers<sup>1</sup>

| <b>Sampling Buffer</b> | <b>Peak Width (s) (50% peak height)</b> | <b>Peak Intensity</b> | <b>Migration Time (min)</b> |
|------------------------|-----------------------------------------|-----------------------|-----------------------------|
| 70% Acetic Acid        | 8.6 ± 2.5                               | (8.2 ± 5.3)E6         | 4.7±0.7                     |
| 0.25% FA               | 7.4 ± 0.3                               | (5.0 ± 1.0)E6         | 3.8±0.1                     |

<sup>1</sup>CZE was coupled to LTQ XL mass spectrometer (Thermo Fisher Scientific) for cytochrome c characterization. A 40 cm LPA-coated capillary was used for separation. The voltage applied was 16 kV for CE separation and 1.5 kV for electrospray.

(A) WT25\_50ul\_50cm #888 RT: 17.47 AV: 1 NL: 2.12E5  
T: FTMS + p NSI d Full ms2 1515.90@hcd25.00 [266.00-4000.00]

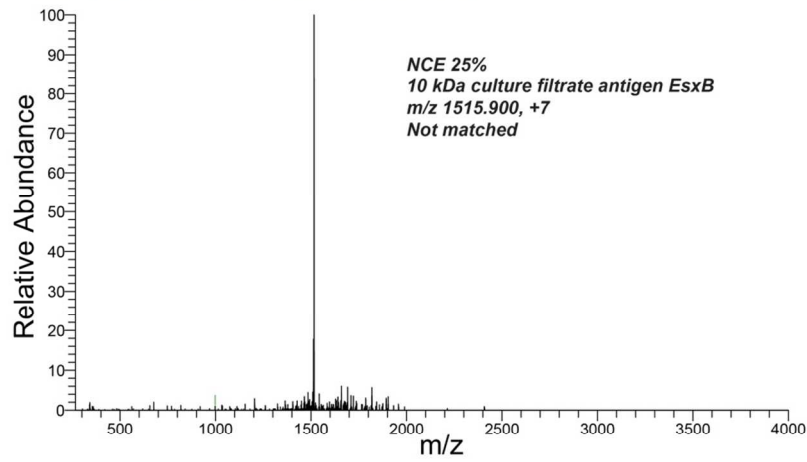

(B) WT30\_50ul\_50cm #895 RT: 17.73 AV: 1 NL: 1.29E5  
T: FTMS + p NSI d Full ms2 1515.89@hcd30.00 [266.00-4000.00]

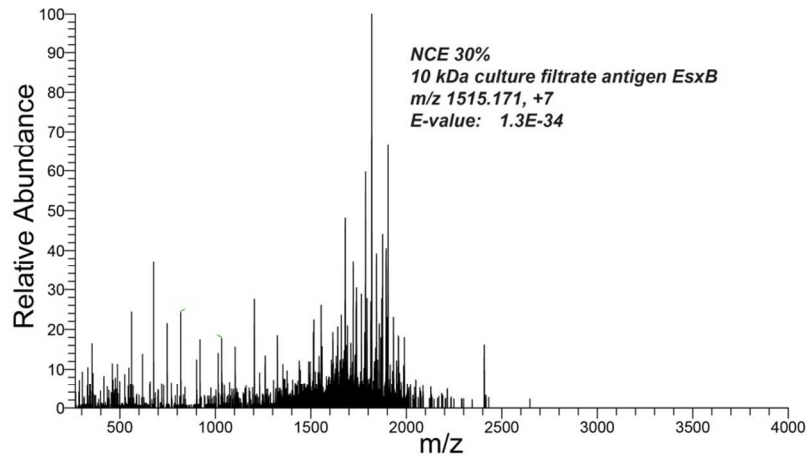

(C) WT35\_50ul\_50cm #1018 RT: 19.92 AV: 1 NL: 7.36E3  
T: FTMS + p NSI d Full ms2 1516.18@hcd35.00 [266.00-4000.00]

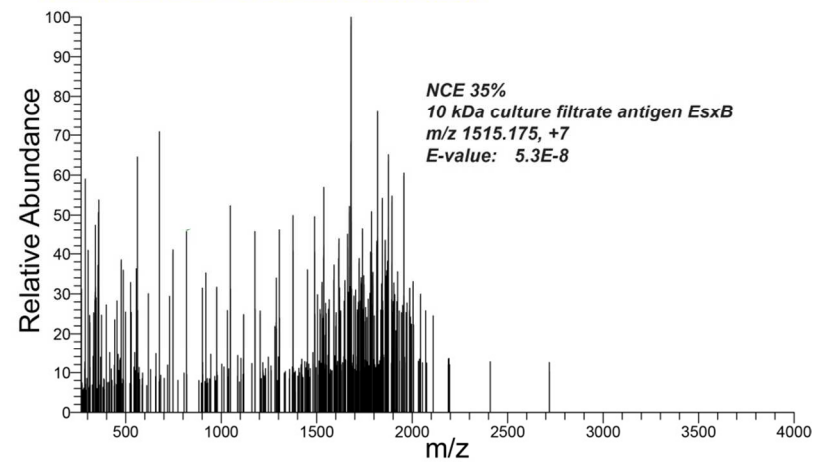

**Fig. S1** HCD fragmentation of the 10-kDa culture filtrate antigen EsxB with NCE of (A) 25%. (B) 30%. (C) 35%.

WT28\_50ul\_50cm #1388 RT: 30.22 AV: 1 NL: 8.34E4  
T: FTMS + p NSI Full ms [600.00-2000.00]

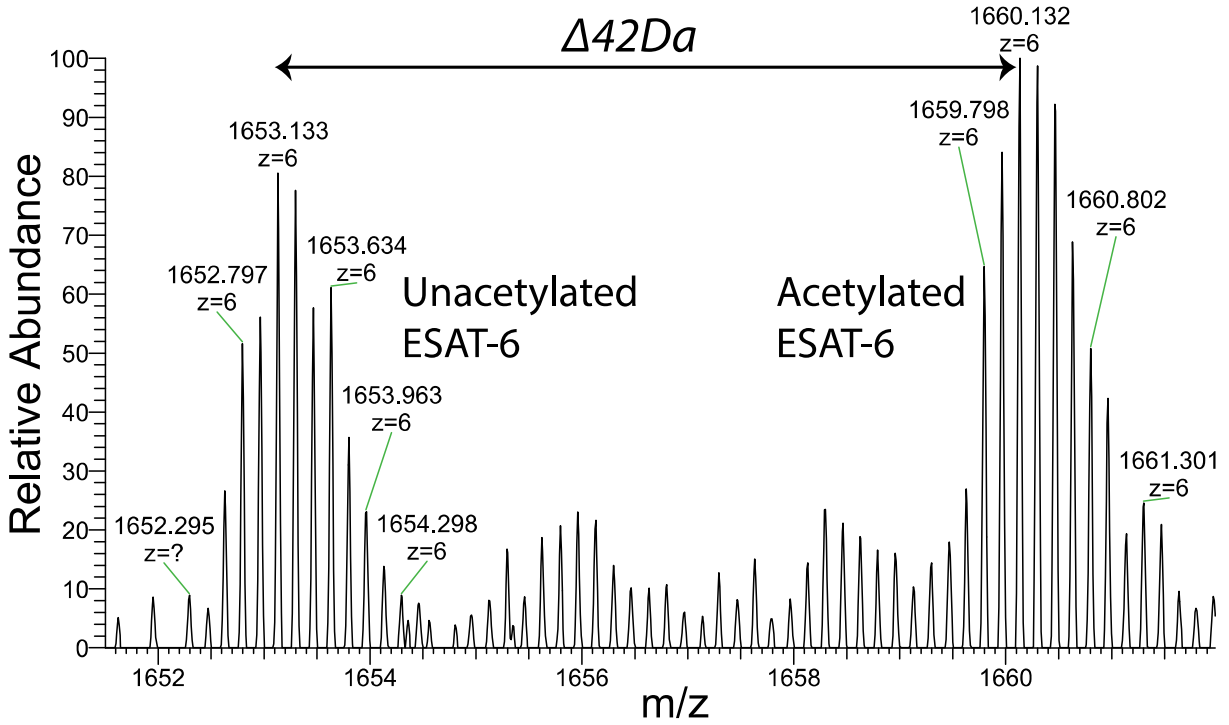

Fig. S2 Spectrum of both unacetylated ESAT-6 and acetylated ESAT-6.
